# Supplementary material for: Engineered feature embeddings meet deep learning: A novel strategy to improve bone marrow cell classification and model transparency
Source: PubMed Central journal article supplement — J Pathol Inform. 2024 Jul 3;15:100390. doi: 10.1016/j.jpi.2024.100390 (PMC11662281; doi:10.1016/j.jpi.2024.100390), 2024-07-03
Supplement: mmc1.pdf [file mmc1.pdf]

**Table A 1. Per-class validation performance of region-attention embedding in combination with Xception network, in terms of precision, recall and f1-score. Additionally, the support of the corresponding classification values is presented in the right most column, to provide a better contextualization of the obtained values and their dependency to the number of images in each class**

| Cell subtype | Mean Precision | Mean recall | Mean f1-score | Support |
|--------------|----------------|-------------|---------------|---------|
| ABE          | 0,44           | 0,28        | 0,33          | 2       |
| ART          | 0,8            | 0,82        | 0,81          | 3448    |
| BAS          | 0,71           | 0,56        | 0,61          | 90      |
| BLA          | 0,76           | 0,77        | 0,76          | 2171    |
| EBO          | 0,89           | 0,89        | 0,89          | 3596    |
| EOS          | 0,84           | 0,76        | 0,80          | 1129    |
| FGC          | 0,59           | 0,43        | 0,47          | 10      |
| HAC          | 0,74           | 0,63        | 0,66          | 94      |
| KSC          | 0,57           | 0,39        | 0,42          | 11      |
| LYI          | 0,78           | 0,38        | 0,46          | 10      |
| LYT          | 0,88           | 0,91        | 0,89          | 5669    |
| MMZ          | 0,73           | 0,69        | 0,71          | 610     |
| MON          | 0,71           | 0,73        | 0,72          | 783     |
| MYB          | 0,73           | 0,71        | 0,72          | 1301    |
| NGB          | 0,78           | 0,80        | 0,79          | 1979    |
| NGS          | 0,89           | 0,90        | 0,89          | 3897    |
| NIF          | 0,75           | 0,64        | 0,68          | 691     |
| OTH          | 0,66           | 0,49        | 0,53          | 51      |
| PEB          | 0,78           | 0,64        | 0,69          | 487     |
| PLM          | 0,80           | 0,75        | 0,77          | 1402    |
| PMO          | 0,76           | 0,78        | 0,77          | 2399    |

**Table A 2. Complementary feature organization experiment results. In the second row, all averaged results are presented given the combination of a randomized region-attention embedding arrangement and Xception network, while in the third row averaged results are shown when combining region-attention embedding and a linear neural network with no convolutional layers**

| Complementary Experiment                                           | Average score type | Accuracy | Precision | Recall | F1-score | Specificity |
|--------------------------------------------------------------------|--------------------|----------|-----------|--------|----------|-------------|
| Randomizing feature organization within region-attention embedding | Weighted           | 0,78     | 0,77      | 0,78   | 0,77     | 0,98        |
|                                                                    | Micro              | 0,78     | 0,78      | 0,78   | 0,78     | 0,99        |
|                                                                    | Macro              | 0,59     | 0,67      | 0,59   | 0,61     | 0,99        |
| Linear neural network (no convolution layers)                      | Weighted           | 0,54     | 0,54      | 0,55   | 0,54     | 0,95        |
|                                                                    | Micro              | 0,54     | 0,54      | 0,54   | 0,54     | 0,98        |
|                                                                    | Macro              | 0,30     | 0,34      | 0,30   | 0,31     | 0,98        |

**Table A 3. Data ablation experiment results. Comparison between the classification performance of Xception network trained by using consecutively 2000 and 1000 images represented as: region-attention embeddings (second row), and original RGB images (third row), together with imageNet weights , and 2000 and 1000 RGB images, but trained from scratch. The best classification results are presented in bold, for both cases, using 2000 and 1000 images**

| Classification strategy                           | Number of images | Averaging type | Accuracy    | Precision   | Recall      | F1-score    |
|---------------------------------------------------|------------------|----------------|-------------|-------------|-------------|-------------|
| Region-attention embedding + Xception             | 2000 images      | Micro          | 0,73        | 0,73        | 0,73        | 0,73        |
|                                                   |                  | Macro          | 0,64        | 0,67        | 0,64        | 0,65        |
|                                                   |                  | Weighted       | <b>0,73</b> | <b>0,73</b> | <b>0,73</b> | <b>0,73</b> |
|                                                   | 1000 images      | Micro          | 0,72        | 0,72        | 0,72        | 0,72        |
|                                                   |                  | Macro          | 0,66        | 0,68        | 0,66        | 0,67        |
|                                                   |                  | Weighted       | <b>0,72</b> | <b>0,72</b> | <b>0,72</b> | <b>0,72</b> |
| Xception (imageNet weights) + RGB image input     | 2000 images      | Micro          | 0,3         | 0,94        | 0,36        | 0,28        |
|                                                   |                  | Macro          | 0,3         | 0,92        | 0,33        | 0,28        |
|                                                   |                  | Weighted       | 0,3         | 0,93        | 0,36        | 0,28        |
|                                                   | 1000 images      | Micro          | 0,37        | 0,84        | 0,04        | 0,37        |
|                                                   |                  | Macro          | 0,35        | 0,83        | 0,036       | 0,36        |
|                                                   |                  | Weighted       | 0,35        | 0,83        | 0,036       | 0,36        |
| Xception (trained from scratch) + RGB image input | 2000 images      | Micro          | 0,63        | 0,67        | 0,59        | 0,62        |
|                                                   |                  | Macro          | 0,60        | 0,68        | 0,53        | 0,59        |
|                                                   |                  | Weighted       | 0,63        | 0,67        | 0,59        | 0,62        |
|                                                   | 1000 images      | Micro          | 0,46        | 0,86        | 0,18        | 0,42        |
|                                                   |                  | Macro          | 0,45        | 0,84        | 0,18        | 0,41        |
|                                                   |                  | Weighted       | 0,46        | 0,86        | 0,18        | 0,42        |
